# Supplementary material for: The telemedicine community readiness model—successful telemedicine implementation and scale-up
Source: PubMed Central journal article supplement (PMC9995762; doi:10.3389/fdgth.2023.1057347), 2023-02-23
Supplement: Datasheet1.pdf [file Datasheet1.pdf]

## Annex

### Annex A1 - Detailed description of improvement aspects

|                      | <b>Improvement aspect</b>                                                                                                       | <b>Description</b>                                                                                                                                                                                                                                          |
|----------------------|---------------------------------------------------------------------------------------------------------------------------------|-------------------------------------------------------------------------------------------------------------------------------------------------------------------------------------------------------------------------------------------------------------|
| Level 1: Preplanning | Involvement of stakeholders (decision makers, users, etc.) in the development of telemedicine initiatives                       | User-centred design processes should involve potential users – in this case patients, citizens, healthcare professionals, etc.                                                                                                                              |
|                      | Holistic objective for telemedicine implementation                                                                              | Vision for telemedicine in the community should include all stakeholders and areas in the community itself                                                                                                                                                  |
|                      | Basic technical/ infrastructural requirements are clear to those planning telemedicine initiatives                              | Instead of needing to know all the technical/ infrastructural requirements from the beginning of the TI onwards, the basic requirements needed to set up telemedicine in the first place (e.g. internet, Bluetooth, and/or telephone line) need to be known |
|                      | Risk management                                                                                                                 | Probability of occurrence and extent of damage for possible risks need to be known and adequately addressed                                                                                                                                                 |
|                      | Compliance with regulatory requirements                                                                                         | All regulatory requirements need to be clear and followed (e.g. regarding jurisdiction, liability)                                                                                                                                                          |
|                      | Contractual arrangements are documented                                                                                         | All arrangements are recorded to track agreements (written contracts)                                                                                                                                                                                       |
|                      | Ethical guidelines are followed for telemedicine                                                                                | Guidelines for ethics and governance exist, are known, and followed                                                                                                                                                                                         |
|                      | Essential technical infrastructure is provided                                                                                  | Basic hardware and/or software for delivering telemedicine services needs to be provided (e.g. iPad, SIM card)                                                                                                                                              |
| Level 2: Preparation | Step-by-step implementation plan                                                                                                | Continuous operationalisation of the holistic objective, including the definition of processes, responsibilities and workforce                                                                                                                              |
|                      | Requirements, aims and outcomes for telemedicine initiatives in the community are defined                                       | Expectations for implementing TIs in the community are defined and in line with the community objectives and the implementation plan                                                                                                                        |
|                      | The information management is transparent to all stakeholders                                                                   | Provision of sufficient information to actively address worries and anxieties                                                                                                                                                                               |
|                      | Awareness campaigns for the existence of TIs to expand knowledge about them                                                     | Users need to know about the existence of TIs, otherwise they cannot use them                                                                                                                                                                               |
|                      | Existence of hierarchical structures, which can be adapted for telemedicine responsibilities                                    | This is a prerequisite for the assignment of responsibilities so that things can move forward (the structures should preferably be documented in written form)                                                                                              |
|                      | Guidelines for decision making in the community support the community climate and are in line with the beliefs of the community | Hierarchical decision making is possible to avoid missing consensus and conflict potential --> if it violates community values, parallel structures would be created, which hinder efficiency and lead to stubbornness                                      |
| Level 3: Initiation  | Awareness campaigns about the existence of TIs, which also include the users' peers as target group                             | Users of TIs can be influenced by their peers                                                                                                                                                                                                               |
|                      | One or more person(s) are designated as responsible for telemedicine and authority is allocated to them                         | Based on the existing hierarchical structures, there are clear decision-making competencies (which should be located with existing people to avoid parallel structures and to bundle knowledge/competence)                                                  |

|                                  |                                                                                                                                                                                      |                                                                                                                                                                                                                                                  |
|----------------------------------|--------------------------------------------------------------------------------------------------------------------------------------------------------------------------------------|--------------------------------------------------------------------------------------------------------------------------------------------------------------------------------------------------------------------------------------------------|
|                                  | Provision of a forum for communication, (inter- and intra-group) cooperation, data management, and the creation of trust among stakeholders who are mutually dependent on each other | Cooperation of the involved actors is directly supported and made transparent for all persons involved (according to community climate and beliefs)                                                                                              |
|                                  | Provision of adequate financial resources for TIs                                                                                                                                    | The focus here is explicitly on community resources                                                                                                                                                                                              |
| Level 4: Stabilisation           | All technical/ infrastructural requirements are clear to those planning telemedicine initiatives                                                                                     | At this point, all requirements need to be clear to provide the best possible TI                                                                                                                                                                 |
|                                  | A sustainable scaling up strategy is defined                                                                                                                                         | Continuous implementation of the vision in the existing system should be combined with a realistic implementation strategy                                                                                                                       |
|                                  | Awareness campaigns of benefits of telemedicine are based on effectiveness studies                                                                                                   | Information only about the existence of telemedicine is not enough for permanent use; benefits should be shown and communicated as soon as possible                                                                                              |
|                                  | Provision of adequate human resources for TIs                                                                                                                                        | The focus here is explicitly on community resources                                                                                                                                                                                              |
|                                  | The communication is culturally appropriate to reach all potential end-users equally                                                                                                 | Equal access should be ensured by including all potential users and by a supportive community climate                                                                                                                                            |
| Level 5: Confirmation/ Expansion | Continuous improvement/ performance management (including supportive policies)                                                                                                       | TIs should not be left to itself; once they are up and running, uniform rules for all TIs in the community need to be in place and monitored regularly                                                                                           |
|                                  | Programs to diminish existing inequalities in healthcare and to increase (health/digital) literacy                                                                                   | As another aspect of inclusion, equal access to using the existing TIs should be ensured for all members of the community (inequalities can result from, e.g., education, socio-economic factors, demographics, or health and employment status) |
|                                  | Training and qualification for all relevant stakeholders                                                                                                                             | Increase competence, ability and comfort when using telemedicine and improve (e-) health literacy for all stakeholders (not only frontrunners use and have the chance, but usage hurdles are removed)                                            |
| Level 6: Professionalisation     | Structural programs to ensure that an adequate number of people is available in the workforce and equipped with the necessary skills and knowledge                                   | Proprietary programs for the development of well-trained workforces exist to ensure long-term sustainable use                                                                                                                                    |
|                                  | Telemedicine initiatives and further existing IT infrastructure are interoperable                                                                                                    | The telemedicine initiatives are no isolated solutions that can die off more quickly in favour of an all-encompassing platform that has different compartments                                                                                   |

## Annex A2 - Adaptions made based on the twelve evaluation interviews

|             | Category                                   | Adaption                                                                                                                                                                                                                                                                                                         | Example quotes/evidence                                                                                                                                                                                       |
|-------------|--------------------------------------------|------------------------------------------------------------------------------------------------------------------------------------------------------------------------------------------------------------------------------------------------------------------------------------------------------------------|---------------------------------------------------------------------------------------------------------------------------------------------------------------------------------------------------------------|
| Assessment  | Status of telemedicine initiatives         | No adaption necessary                                                                                                                                                                                                                                                                                            | “the first line [...] reads very coherently” (SIE7)                                                                                                                                                           |
|             | Community involvement                      | Addition of percentage shares                                                                                                                                                                                                                                                                                    | “where is the border between a small part and the majority? [...] there’s no quantification in here” (SIE7); “what is a small part? 10%, 20%, 30%?” (SIE5)                                                    |
|             | Evidence for telemedicine in the community | Adaption to current version to increase delimitation between descriptions                                                                                                                                                                                                                                        |                                                                                                                                                                                                               |
|             | Level descriptions                         |                                                                                                                                                                                                                                                                                                                  |                                                                                                                                                                                                               |
| Improvement | Improvement aspects                        | Assignment to levels (e.g. “risk management”, shifted from level 1 to level 2)                                                                                                                                                                                                                                   | Overall median = 1.5, many experts expressed the view that risks need to be managed from the beginning onwards as, even if small risks occur, they can prevent further success of the telemedicine initiative |
|             |                                            | Assignment to levels (e.g. “sustainable scaling up strategy” shifted from level 2 to level 4)                                                                                                                                                                                                                    | Overall median = 3.5                                                                                                                                                                                          |
|             |                                            | Wording (e.g. “all technical/ infrastructural requirements are clear to those planning telemedicine initiatives”, where a target audience for the requirements was added and the aspect was accompanied by “basic technical/ infrastructural requirements are clear to those planning telemedicine initiatives”) | “to whom are they known? [...] users [...], doctors or developers?” (SIE2)                                                                                                                                    |
|             |                                            | Splitting (e.g. “all technical/ infrastructural requirements are clear to those planning telemedicine initiatives” was accompanied by “basic technical/ infrastructural requirements are clear to those planning telemedicine initiatives”)                                                                      | “‘all’ is always such a big word” (SIE1)                                                                                                                                                                      |
|             |                                            | Merging (e.g. of having persons being responsible for telemedicine and allocating authority to them to “one or more person(s) are designated as responsible for telemedicine and authority is allocated to them”)                                                                                                |                                                                                                                                                                                                               |

Annex A3 - Results of assignments from all interviews – the table shows the individual assignment of improvement factors to levels per interview partner

Legend:

“-”: The aspect was not rated by the interviewee (e.g. “Basic technical/ infrastructural requirements are clear to those planning telemedicine initiatives” was added over time);  
 “X.5”: The interviewee rated the aspect between two levels

| Level                | Improvement aspect                                                                                                                    | Rating per interview partner<br>(Structure interview expert (SIE) no) |   |   |     |     |     |   |     |   |    |    |     | Median |           |         |
|----------------------|---------------------------------------------------------------------------------------------------------------------------------------|-----------------------------------------------------------------------|---|---|-----|-----|-----|---|-----|---|----|----|-----|--------|-----------|---------|
|                      |                                                                                                                                       | 1                                                                     | 2 | 3 | 4   | 5   | 6   | 7 | 8   | 9 | 10 | 11 | 12  | Total  | Australia | Germany |
| Level 1: Preplanning | Stakeholders (decision makers, users, etc.) are involved in the development of telemedicine initiatives                               | 2                                                                     | 1 | 2 | 2   | 1   | 1.5 | 1 | 1   | 2 | 2  | 2  | 1   | 1.75   | 2         | 1.5     |
|                      | Holistic objective for telemedicine implementation                                                                                    | 5.5                                                                   | 1 | 3 | 2   | 1   | 1   | 3 | -   | 1 | 1  | 2  | 1.5 | 1.5    | 1.25      | 2       |
|                      | Basic technical/ infrastructural requirements are clear to those planning telemedicine initiatives                                    | -                                                                     | 1 | - | -   | -   | -   | - | 1   | 1 | 2  | 2  | 1   | 1      | 1         | 1       |
|                      | Risk management                                                                                                                       | 1                                                                     | 1 | 4 | 3.5 | 2   | 4   | 2 | 1   | 1 | 6  | 1  | 1   | 1.5    | 1         | 2       |
|                      | Compliance with regulatory requirements                                                                                               | 1                                                                     | 1 | 1 | 3   | 2   | 3   | 4 | 1   | 1 | 6  | 1  | 2   | 1.5    | 1         | 2       |
|                      | Contractual arrangements are documented                                                                                               | 1                                                                     | 1 | 1 | 3   | 1   | 1   | 4 | -   | 3 | 6  | -  | 1   | 1      | 3         | 1       |
|                      | Ethical guidelines are followed for telemedicine                                                                                      | 3.5                                                                   | 1 | 3 | 3   | 1   | 2   | - | 1   | 1 | 1  | 1  | 1   | 1      | 1         | 2.5     |
|                      | Essential technical infrastructure is provided                                                                                        | 1                                                                     | 1 | 1 | 1   | 2   | 3   | 1 | 1   | 2 | 4  | 1  | 2   | 1      | 2         | 1       |
| Level 2: Preparation | The community has a step-by-step implementation plan                                                                                  | 2.5                                                                   | 2 | 4 | 2   | 2   | 3   | 2 | 2.5 | 3 | 3  | 4  | 1.5 | 2.5    | 3         | 2       |
|                      | Requirements, aims and outcomes for telemedicine initiatives in the community are defined                                             | 2.5                                                                   | 2 | 1 | 3   | 2   | 1.5 | 2 | 2   | 1 | 1  | 1  | 1   | 1.75   | 1         | 2       |
|                      | The information management is transparent to all stakeholders                                                                         | 2                                                                     | 1 | 5 | 2   | 3   | 4   | 2 | 1   | 3 | 2  | 3  | 1   | 2      | 2         | 2       |
|                      | Implementation of awareness campaigns for the existence of telemedicine to expand knowledge about telemedicine initiatives            | 2                                                                     | 2 | 4 | 2   | 3   | 1   | 2 | 3   | 1 | 3  | 5  | 1   | 2      | 3         | 2       |
|                      | Existing hierarchical structures need to be defined clearly to be adapted for telemedicine responsibilities                           | 2                                                                     | 2 | 1 | 4   | 2   | 1   | 1 | -   | 1 | 3  | 3  | 1   | 2      | 2         | 2       |
|                      | The community has guidelines for decision making that support the community climate and are in line with the beliefs of the community | 3.5                                                                   | 1 | 3 | 3   | 1   | 2   | 2 | -   | 2 | 2  | 2  | 2   | 2      | 2         | 2       |
| Level 3: Initiation  | Extension of awareness campaigns by including the users’ peers as target group                                                        | 3                                                                     | 3 | 5 | 4.5 | 3   | -   | - | 3   | 3 | 4  | 4  | 2   | 3      | 3         | 3       |
|                      | One or more person(s) are designated as responsible for telemedicine and authority is allocated to them                               | 3.5                                                                   | 2 | 2 | 4   | 2.5 | 3   | 2 | -   | 2 | 1  | 3  | 1   | 2      | 1.5       | 2.5     |

|                                  |                                                                                                                                                                                                |     |     |   |     |     |   |     |     |   |     |   |     |     |     |      |
|----------------------------------|------------------------------------------------------------------------------------------------------------------------------------------------------------------------------------------------|-----|-----|---|-----|-----|---|-----|-----|---|-----|---|-----|-----|-----|------|
|                                  | The community provides a forum for communication, (inter- and intra-group) cooperation, data management, and the creation of trust among stakeholders who are mutually dependent on each other | 2   | 3   | 6 | 3   | 4.5 | 3 | 1   | -   | 3 | 2   | 3 | 2   | 3   | 2.5 | 3    |
|                                  | The community provides adequate financial resources for telemedicine initiatives                                                                                                               | 4   | 1   | 6 | 2   | 3   | 3 | 3   | 2   | 3 | 5.5 | 1 | 3   | 3   | 3   | 3    |
| Level 4: Stabilisation           | All technical/ infrastructural requirements are clear to those planning telemedicine initiatives                                                                                               | 3   | -   | 5 | 3   | 2   | 3 | 4   | 5   | 2 | 3   | 6 | 2   | 3   | 3   | 3    |
|                                  | A sustainable scaling up strategy is defined                                                                                                                                                   | 3.5 | 2   | 3 | 4.5 | 4   | - | 3   | 4   | 3 | 4   | 3 | 4   | 3.5 | 4   | 3.25 |
|                                  | Awareness campaigns of benefits of telemedicine exist (based on effectiveness studies)                                                                                                         | 4   | 4   | 6 | 4.5 | 2   | 2 | 4   | 5.5 | 2 | 2   | 5 | 4   | 4   | 4   | 4    |
|                                  | The community provides adequate human resources for telemedicine initiatives                                                                                                                   | 4   | 1   | 4 | 2   | 3   | 4 | 3   | 3   | 3 | 3   | 2 | 2   | 3   | 3   | 3    |
|                                  | The communication is culturally appropriate in order to reach all potential end-users                                                                                                          | 5   | 3   | 5 | 4   | 2   | 4 | 5   | 5   | 1 | 2   | 2 | 1.5 | 3.5 | 2   | 4    |
|                                  |                                                                                                                                                                                                |     |     |   |     |     |   |     |     |   |     |   |     |     |     |      |
| Level 5: Confirmation/ Expansion | Continuous improvement/ performance management (including supportive policies)                                                                                                                 | 5   | 2   | 5 | 4   | 6   | 5 | 6   | 3.5 | 2 | 6   | 2 | 2   | 4.5 | 2   | 5    |
|                                  | The community sets up programs to diminish existing inequalities in healthcare and to increase (health/digital) literacy                                                                       | 5.5 | 5   | 5 | 3   | 4   | 6 | 3   | 5   | 3 | 1   | 4 | 2.5 | 4   | 3   | 5    |
|                                  | Training and qualification are available for all relevant stakeholders (to increase competence, ability and comfort when using telemedicine and to improve (e-) health literacy)               | 5   | 4   | 6 | 5   | 4   | 1 | 4   | 1   | 3 | 3   | 6 | 1   | 4   | 3   | 4    |
| Level 6: Professionalisation     | The community set up structural programs to ensure that an adequate number of people is available in the workforce and equipped with the necessary skills and knowledge                        | 6   | 4   | 5 | 6   | 3   | 5 | 6   | 1.5 | 3 | 4   | 1 | 3   | 4   | 3   | 5    |
|                                  | Telemedicine initiatives and further existing IT infrastructure are interoperable                                                                                                              | 2   | 1.5 | 5 | 6   | 4   | 2 | 1.5 | 5   | 2 | 4   | 2 | 3   | 2.5 | 3   | 2    |
